# Supplementary material for: Anorexia nervosa in adolescent males
Source: PubMed Central journal article supplement — CMAJ. 2024 Feb 20;196(6):E191. doi: 10.1503/cmaj.230001 (PMC10890230; doi:10.1503/cmaj.230001), 2024-02-20
Supplement: 230001-five-1-at.pdf [file 230001-five-1-at.pdf]

## Appendix 1: Muscularity-Oriented Eating Test

|     | Never true | Rarely true | Sometimes true | Usually true | Always true |
|-----|------------|-------------|----------------|--------------|-------------|
|     | 0          | 1           | 2              | 3            | 4           |
| 1.  |            |             |                | 0            | 1 2 3 4     |
| 2.  |            |             |                | 0            | 1 2 3 4     |
| 3.  |            |             |                | 0            | 1 2 3 4     |
| 4.  |            |             |                | 0            | 1 2 3 4     |
| 5.  |            |             |                | 0            | 1 2 3 4     |
| 6.  |            |             |                | 0            | 1 2 3 4     |
| 7.  |            |             |                | 0            | 1 2 3 4     |
| 8.  |            |             |                | 0            | 1 2 3 4     |
| 9.  |            |             |                | 0            | 1 2 3 4     |
| 10. |            |             |                | 0            | 1 2 3 4     |
| 11. |            |             |                | 0            | 1 2 3 4     |
| 12. |            |             |                | 0            | 1 2 3 4     |
| 13. |            |             |                | 0            | 1 2 3 4     |
| 14. |            |             |                | 0            | 1 2 3 4     |
| 15. |            |             |                | 0            | 1 2 3 4     |
